# Supplementary material for: Gal-2 Increases H3K4me3 and H3K9ac in Trophoblasts and Preeclampsia
Source: MDPI journal article supplement (doi:10.3390/biom12050707), 2022-05-15
Supplement: s1 [file s1]

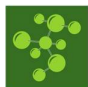

**Supplementary Table S1.** Gestational age and sex of the babies of healthy and PE affected pregnancies.

| Controls          |                 |              | PE                |                 |                        |          |              |                     |                       |
|-------------------|-----------------|--------------|-------------------|-----------------|------------------------|----------|--------------|---------------------|-----------------------|
| Week of Gestation | Sex of the Baby | Maternal Age | Week of Gestation | Sex of the Baby | Weight of the Baby (g) | APGAR    | Maternal Age | Proteinuria (mg/dL) | Blood Pressure (mmHg) |
| 40 + 3            | male            | 17           | 39 + 0            | male            | 3260                   | 10/10/10 | -            | 300                 | 170/100               |
| 40 + 3            | male            | 25           | 36 + 4            | male            | 3250                   | 8/10/10  | 31           | 100                 | -                     |
| 40 + 2            | female          | 39           | 35 + 0            | female          | 1555                   | 8/10/10  | -            | -                   | 180/100               |
| 40 + 2            | female          | 31           | 34 + 6            | -               | -                      | -        | -            | -                   | -                     |
| 40 + 1            | female          | 33           | 34 + 3            | male            | 2100                   | 9/10/10  | 38           | 51,4                | 176/100               |
| 39 + 6            | male            | 30           | 34 + 3            | male            | 1980                   | 10/10/10 | 38           | 51,4                | 176/100               |
| 39 + 6            | female          | 23           | 34 + 1            | male            | 1704                   | 9/10/10  | -            | -                   | -                     |
| 39 + 1            | male            | 35           | 34 + 1            | male            | 2000                   | 7/9/10   | -            | 300                 | 190/100               |
| 39 + 1            | male            | 32           | 32 + 5            | -               | -                      | -        | 29           | -                   | -                     |
| 39 + 0            | male            | 32           | 31 + 1            | Female          | 1370                   | 7/9/9    | 40           | 156                 | 195/95                |
| 38 + 3            | female          | 35           | 29 + 5            | -               | -                      | -        | -            | -                   | -                     |
| 38 + 0            | male            | 22           | -                 | -               | -                      | -        | -            | -                   | -                     |
| 35 + 4            | male            | 34           | -                 | -               | -                      | -        | -            | -                   | -                     |
